# Supplementary material for: Development and validation of bioimpedance prediction equations for fat-free mass in unilateral male amputees
Source: PeerJ journal article supplement (doi:10.7717/peerj.10970), 2021-03-08
Supplement: raw_data(revison)10142020.zip [file code book.xlsx]

## Sheet: Sheet2
			Variables	Measure	Contents
			No
			Name	Sub1~75
			Sex	gender	1=male	2=female
			age	year
			amputated region	amputated region about limb	1=Right above-elbow amputation	2=Right below-elbow amputation	3=Left above-elbo amputation	4=Left below-elbow amputation	5=Right above-knee amputation	6=Right below-knee amputation	7=Left above-knee amputation	8=Left below-knee amputation
			HT	whole-body height (cm)
			Weight	whole-body Weight (kg)
			Trunk_Lth	trunk_length (cm)	anterior region of trunk
			1_2	Length of Right Upper arm (cm)
			2_3	Length of Right Lower arm (cm)
			3_4	Length of Right hand (cm)
			1_2_Con	Circumperence of right upper arm in contraction (cm)
			1_2_Rel	Circumperence of right upper arm in relaxing (cm)
			5_6	Length of left Upper arm (cm)
			6_7	Length of left Lower arm (cm)
			7_8	Length of left hand (cm)
			5_6_Con	Circumperence of left upper arm in contraction (cm)
			5_6_Rel	Circumperence of left upper arm in relaxing (cm)
			A_B	Length of Right upper leg from Anterior Superior Iliac Spine(ASIA) to Patella center (cm)
			B_C	Length of Right lower leg from Patella center to Malleolus (cm)
			A_Heel	Length of Right leg from ASIS to Hell pad (cm)
			D_E	Length of left upper leg from Anterior Superior Iliac Spine(ASIA) to Patella center (cm)
			E_F	Length of left lower leg from Patella center to Malleolus (cm)
			D_Heel	Length of left leg from ASIS to Hell pad (cm)
			Z~BO	DXA PARAMETERS
			BQ~ZH	BIA PARAMETERS
				Abbreviations
				BIA	Bioelectrical impedance analysis
				BMC	Bone mineral content
				BMI	Body Mass Index
				DXA	Dual Energy X- ray Absorptiometry
				FFM	Fat free mass
				FM	Fat free mass
				PBF	Percent Body Fat
				LA	Left arm
				LL	Left leg
				PhA	Phase angle
				RA	Right arm
				RL	Right leg
				SLTM	Soft lean tissue mass
				TBW	Total body water
				TE	Total error
				TR=Tr	Trunk
				Xc	Reactance
				Z	Impedance
				ZI	Impedance index
				1_RA_Z	1khz_Right Arm_Impedance
				50_RA_Z	50khz_Right Arm_Impedance
				250_RA_Z	250khz_Right Arm_Impedance
				500_RA_Z	500khz_Right Arm_Impedance
				1M_RA_Z	1000khz_Right Arm_Impedance
