# Supplementary material for: Development and validation of bioimpedance prediction equations for fat-free mass in unilateral male amputees
Source: PeerJ journal article supplement (doi:10.7717/peerj.10970), 2021-03-08
Supplement: raw_data(revison)10142020.zip [file raw_data(revison)10142020.xlsx]

## Sheet: DATA
No	Name	Sex	age	amputated region	weight	HT	Weight	Trunk_Lth	1_2	2_3	3_4	1_2_Con	1_2_Rel	5_6	6_7	7_8	5_6_Con	5_6_Rel	A_B	B_C	A_Heel	D_E	E_F	D_Heel	LA_LEAN	LL_LEAN	LTRK_LEAN	LEFT_LEAN	RA_LEAN	RL_LEAN	RTRK_LAEN	RIGHT_LEAN	ARMS_LEAN	LEGS_LEAN	TRUNK_LEAN	And_LEAN	Gyno_LEAN	LEAN	LA_FAT	LL_FAT	LTRK_FAT	LEFT_FAT	RA_FAT	RL_FAT	RTRK_FAT	RIGHT_FAT	ARMS_FAT	LEGS_FAT	TRUNK_FAT
1	sub1	1	48	7	92.6	172.9	92.6	53.5	32.3	25.3	19.9	35.9	34.3	33.3	25.1	19.8	34.4	33.5	47.7	42	97.8	39.5	-	-	2945	4727	15003	23985	2945	10909	14005	30896	5889	15636	29007	4423	8998	54881	1427	2460	11888	16110	1427	5616	11057	18860	2854	8075	22945
2	sub2	1	64	7	67	173.4	67	53.5	33.4	27.7	20	34.3	33.2	33.3	26.3	19.8	34.2	32.5	47.5	41.2	96	44.5	-	-	2826	3513	12478	20555	3147	9200	11055	25568	5973	12713	23533	3386	6900	46123	707	1271	6081	8386	788	3303	5359	9859	1495	4574	11439
3	sub3	1	50	5	79.3	175	79.3	57.5	33.4	24.7	19.8	35.2	32.8	32.5	25.3	20.3	36.2	33.8	43.5	-	-	49.4	39.7	95.5	2728	9151	13510	27796	2728	4820	12405	21711	5457	13971	25916	3736	8057	49507	979	4222	10237	15983	979	2248	9450	13075	1957	6470	19687
4	sub4	1	61	8	53.7	170.2	53.7	-	31.8	23.8	19.9	31	30.2	30.8	22.8	19.7	30.1	29.2	48.7	37.1	-	45.7	17.3	-	2398	4572	10720	19721	2641	7540	10735	23182	5039	12112	21455	2850	6146	42903	328	1122	2413	4119	363	1851	2414	4913	691	2973	4827
5	sub5	1	54	7	62.9	168.2	62.9	52.1	33.3	25.5	14.6	33	30.5	33.2	24.8	19.6	34.1	32	43.2	39.3	92.8	33.2	-	-	3029	3431	13787	21847	2894	10812	12902	29473	5922	14242	26689	3898	8248	51319	264	647	3055	4147	249	2029	2855	5461	510	2676	5910
6	sub6	1	26	5	100.6	180.3	100.6	59.2	34.8	24.3	19.4	42.3	39.2	33.4	26.4	19.9	40.8	38.2	26.9	-	-	48.5	40.5	103.3	4595	13100	17708	37879	4534	3160	17726	28123	9129	16260	35434	4619	8908	60823	1504	4304	11516	17824	1240	1298	11364	14387	2744	5602	22880
7	sub7	1	29	5	112.7	185.3	112.7	59.3	37.3	30.2	22.8	47.3	44.1	37.7	29.8	22.1	45	42.7	26.5	-	-	55	43.5	105.2	5289	14675	19951	42008	5281	2593	19393	30598	10570	17268	39344	-	-	67182	2170	4993	13989	21565	2184	1130	11824	15838	4354	6123	25813
8	sub8	1	31	5	73.3	172.1	73.3	53.2	34.4	26.8	19.6	35.6	33.7	34.7	26.2	19.8	37.3	34.5	35.8	-	-	48.3	41.4	98.9	2873	9130	10458	24451	3110	3833	9571	18333	5983	12964	20029	2821	6925	42783	1287	6090	8643	16523	1373	2576	7900	12313	2660	8667	16543
9	sub9	1	19	7	74.6	170.3	74.6	55.7	32.1	25.2	20.3	38.2	33.9	31.4	24.5	20.4	38.6	35	45.3	37.4	90.2	28.8	-	-	3800	2807	12338	21277	3800	10685	12016	28591	7600	13491	24354	3238	7449	49868	1345	1154	8346	11335	1345	4309	8100	14197	2691	5462	16446
10	sub10	1	41	8	58.5	176.3	58.5	53.8	35.7	26.6	21.3	31.8	31.3	35.4	25.9	22.3	30	29.1	49.9	39.1	99.6	49.2	15.7	63.8	3549	5181	14322	25253	4018	10871	13587	30874	7566	16053	27909	3693	8491	56127	165	373	854	1545	187	784	810	1948	352	1157	1664
11	sub11	1	55	4	66.3	162.2	66.3	48.2	32.4	22.6	19.2	31.8	29.5	31.4	17.2	-	27.5	25.8	44.6	33.7	88.3	44.5	33.4	88.2	1687	8650	11457	23496	2676	8638	10771	24421	4363	17288	22228	3380	7513	47917	497	2500	6138	9441	781	2498	5767	9476	1278	4998	11905
12	sub12	1	54	8	58.9	167.6	58.9	52.2	32.7	25.4	18.6	32.3	29.9	31.7	25.8	18.8	30.9	28.7	44.2	37.7	92.7	44.8	3.5	-	2962	4249	12044	21016	3015	9108	11668	26349	5976	13357	23712	3214	7162	47365	419	1172	3857	5706	425	2505	3733	7033	844	3677	7590
13	sub13	1	46	5	63.9	177.2	63.9	56.2	32.6	25.8	20.2	31	30.2	32.7	26.4	20.5	32.7	31	36.3	-	-	51.4	38.5	95.1	3329	7785	12790	27094	3218	2982	12598	20022	6547	10767	25388	3218	6801	47116	763	3070	5470	9862	737	1180	5401	7534	1500	4250	10871
14	sub14	1	41	3	84.6	170.1	84.6	52.8	31.9	25.3	18.4	36.5	33.4	26.5	-	-	28.5	27.5	45.4	38.3	92.6	45.8	38.7	94.1	1148	10396	13525	27130	1148	11413	13437	28478	2296	21810	26961	3933	9011	55608	466	2582	8200	11622	466	2839	8132	11885	931	5422	16332
15	sub15	1	53	5	71.5	167	71.5	49.3	31.3	24.2	21.2	34.1	30.8	30.3	24.3	21.3	34	33.2	43.8	-	-	44.2	39.3	94.3	3409	10033	13619	28492	3831	4471	12359	23524	7240	14504	25978	3658	7357	52016	660	3228	5734	9874	736	1445	5190	7867	1396	4673	10924
16	sub16	1	61	8	81.8	168.1	81.8	53.8	32.5	23.2	19.6	31.3	30.4	31.3	22.8	20.8	37.5	33.6	48.2	38.8	96.4	48.8	18.1	-	2754	7007	11992	24208	3143	9479	12553	26979	5897	16486	24545	3739	8012	51186	1249	2724	8669	13223	1422	3671	9091	14603	2671	6395	17760
17	sub17	1	30	8	58.8	170.8	58.8	53.8	30.4	24.2	19.2	32	30.5	31.2	22.7	18.7	30.5	28.1	44.8	38.1	91.4	47.2	10.5	-	2557	5013	11609	20973	3101	8171	10923	24950	5658	13184	22532	2994	6518	45923	410	1344	3201	5197	497	2189	3006	6063	907	3533	6207
18	sub18	1	57	8	69	165.5	69	50.2	32.3	24.6	20.3	34	31.3	31.2	25.2	19.8	32.5	30.4	48.5	38.2	94.6	38.3	-	-	2886	3204	10662	18321	2884	8440	10396	24423	5770	11644	21057	3032	6371	42744	930	1275	8210	10773	912	3271	7970	12761	1842	4546	16180
19	sub19	1	37	5	59.4	163.5	59.4	54.8	30.6	23.5	19.2	35	31.1	31	24.2	18.9	32.2	30.3	31.4	-	-	45.9	36.8	88.6	2922	6691	10188	21718	3051	2905	9709	17815	5973	9596	19897	2662	5791	39533	779	3648	5212	10029	814	1582	4970	7803	1593	5230	10182
20	sub20	1	23	5	92.6	173.4	92.6	51.2	33.3	25.9	20.8	38.2	34.5	32.7	26.8	20.5	39.5	36.8	43.5	-	-	48.2	40.8	98.3	3972	12294	13143	31422	3482	6161	12676	24774	7454	18454	25819	3858	8366	56195	1504	6659	9694	18322	1338	3349	9321	14569	2842	10008	19015
21	sub21	1	20	7	68.4	175.2	68.4	53.6	35.2	26.7	22.3	37	35.4	34.4	26.6	21.1	35.3	32.8	49.3	40.4	98.5	30.6	-	-	3846	3161	12873	22323	4204	11569	12384	30404	8050	14730	25257	3442	7446	52726	705	875	3600	5502	771	3201	3465	7730	1476	4077	7065
22	sub22	1	36	8	84.7	179.1	84.7	58.8	31.8	24.3	19.3	38.6	35.5	30.6	23.8	18.9	37.8	36.2	47.6	39.4	97.2	47.3	18.8	-	3657	8009	14345	28033	3892	11116	13566	30874	7549	19125	27912	3776	9535	58907	897	2429	7422	11090	955	3352	7008	11703	1852	5781	14431
23	sub23	1	49	1	73.7	174.2	73.7	54.8	19.7	-	-	-	-	31.7	23.3	18.5	35	32.7	48.5	39.7	95.6	47.5	39.5	94.6	3340	9954	14175	29827	351	9863	13045	25299	3692	19816	27220	3552	8867	55126	500	2418	5368	8647	59	2396	4953	7723	559	4815	10320
24	sub24	1	26	6	84.5	178.8	84.5	57.8	34.2	26.8	20.9	34.9	32.5	34.6	25.4	19.3	34.8	32.9	47.3	20.3	-	47.2	40.7	98.1	3510	10864	11771	28507	3488	7812	11813	24793	6999	18676	23584	3329	8938	53300	1128	5782	7496	14910	1122	4163	7533	13178	2249	9945	15028
25	sub25	1	53	5	71.7	162.3	71.7	-	30.1	22.3	19.7	36.4	32.3	29.5	22.4	19.1	36	31.3	21.7	-	-	44.3	35.2	88.3	3268	9345	11235	25737	3425	1938	12260	20929	6693	11283	23496	3562	6795	46666	1002	3015	7531	11950	1059	656	8254	10661	2061	3671	15785
26	sub26	1	53	8	84.1	170.2	84.1	52.3	31.8	24.1	18.5	39.2	33.6	32.3	24.6	18.9	38.6	35.2	47.1	38.3	94.6	47	23.2	-	4012	7730	13516	26753	4092	10687	12598	30407	8104	18417	26114	3664	9040	57160	1047	2678	7796	11802	1065	3678	7266	12576	2112	6356	15061
27	sub27	1	37	2	85.7	183.2	85.7	51.1	35.8	13.3	-	35.1	32.5	35.8	27.1	22.9	37.6	35	52.4	41.9	99.5	52.6	41.2	100.4	3932	11139	13887	31554	2473	11227	13517	29393	6404	22366	27405	3618	9114	60947	1110	3870	5739	11174	703	3904	5581	10573	1814	7774	11320
28	sub28	1	38	7	95.4	175.5	95.4	56.3	30.6	22.8	19.9	36.9	35.2	30.8	21.9	20.2	34.9	33.8	46.8	39.2	95.9	40.7	-	-	2876	5260	15803	25869	2876	10942	14021	30685	5752	16203	29824	4947	8969	56553	1299	2266	12860	16903	1299	4621	11365	17979	2598	6887	24225
29	sub29	1	30	6	82.2	170.8	82.2	55.4	30.8	22.7	18.8	36.5	35.1	30.7	21.4	18.4	34.9	33.5	44.2	15.9	-	44.4	37.2	93.3	3229	9921	12750	27434	3480	6726	12630	25773	6709	16647	25380	3539	7969	53207	821	4170	8308	13608	880	2839	8225	12527	1701	7009	16533
30	sub30	1	60	4	69.4	164.2	69.4	51.8	30.4	24.6	20.1	31.9	29.2	29.8	16.1	-	29.5	27.4	43.6	35.8	85.8	43.8	36.6	86.5	1696	8198	11444	24406	2618	8158	12727	24433	4314	16357	24171	3760	7177	48838	545	2834	4954	8913	838	2819	5528	9366	1383	5654	10482
31	sub31	1	46	7	88.9	174.2	88.9	53.8	31.7	24.8	19.8	39	34.3	31.2	24.5	19.7	38	35.3	47.5	39.8	97.8	42.3	-	-	3631	4719	14517	25832	3500	11177	14111	30581	7131	15896	28629	4003	8345	56412	1425	2225	9473	13803	1371	5230	9227	16240	2796	7456	18701
32	sub32	1	32	7	73.1	164.9	73.1	53.7	30.5	22.8	18.3	36.3	33.5	30.3	22.6	18.8	34.9	32.6	41.6	36.4	86.3	37.9	-	-	3077	3972	12101	20235	2795	8602	12362	26245	5872	12575	24462	3626	7654	46480	1155	1440	8179	11016	1051	3067	8322	12985	2206	4508	16500
33	sub33	1	55	6	65.9	173.4	65.9	54.9	31.9	24.2	21.2	30.7	28.9	31.5	24.2	20.2	31.2	29.5	48.4	16.3	-	46.3	37.3	93.2	2875	7919	14190	26929	2868	5539	13807	24923	5743	13459	27997	3967	7009	51852	535	2031	3785	6620	532	1421	3683	6007	1067	3452	7469
34	sub34	1	57	7	72	167.5	72	52	33	25.5	18.6	34	30.5	31.5	25.8	18.8	32..9	29.8	49	38.7	94.8	40	-	-	2967	3627	12201	20786	3309	8809	12148	26661	6276	12436	24349	3412	7330	47447	1022	1289	7467	10192	1138	3059	7408	12106	2160	4348	14875
35	sub35	1	51	5	63.9	171.6	63.9	52	33.2	26.2	18.3	32.8	29.1	32.6	27	18.8	32.9	28.7	38.5	-	-	49	37.5	94.8	2763	9291	11521	25354	2968	3558	12421	21141	5731	12849	23942	2972	7177	46495	778	2733	4513	8318	836	1057	4870	7123	1614	3790	9382
36	sub36	1	33	4	76	180	76	55.7	31.6	25.3	20.7	33.6	30	30.6	14.9	-	27.9	26.5	51.5	40.3	100.3	50.6	40.3	100.4	1850	9845	13367	27021	3479	10478	12614	28463	5329	20323	25981	3339	8653	55484	388	2598	5528	8822	719	2764	5210	8992	1107	5362	10738
37	sub37	1	34	4	70.7	163.7	70.7	51.3	28.3	22.7	18.9	33.5	32.4	26.2	6.5	-	26	25.1	44.2	36.5	89.5	44.3	36.5	89.3	1315	8873	12158	22346	3055	8973	11761	26057	4370	17846	23920	3240	8171	50297	365	2659	5378	8716	835	2689	5195	9094	1200	5348	10573
38	sub38	1	52	6	64.9	163.3	64.9	51.3	32.7	24.3	18.7	34.1	31.6	33.6	24.3	18.6	32.8	30.4	46.2	14.2	-	45.8	36.6	88	2943	9090	11824	26073	3022	5573	12121	22644	5965	14662	23944	3065	6959	48717	502	2344	4003	7179	513	1444	4108	6352	1016	3788	8111
39	sub39	1	29	6	65.6	165	65.6	53.3	29.6	23.8	19.4	31.8	29.4	29.5	23.2	19.7	30.5	28.4	44.5	12.3	-	45.8	38.2	92.3	2347	8171	11339	23634	2360	4366	10532	19867	4706	12537	21871	2698	5938	43501	937	3500	5947	10745	942	1878	5528	8872	1879	5378	11474
40	sub40	1	21	5	61.8	172.8	61.8	54.8	31.2	24.4	17.6	31.8	29.6	31.2	24.3	18.8	32.3	31.2	32.3	-	-	46.3	39.3	92.7	2901	8618	11854	24780	3057	2923	11269	20108	5959	11541	23123	2945	6385	44888	774	3654	3933	8596	816	1228	3729	6250	1590	4881	7662
41	sub41	1	59	8	68.1	168.2	68.1	48.6	31.8	22.8	19.9	27.8	26.9	30.9	22.6	19.6	27.6	25.9	46.8	36.6	89.8	46.5	21.4	-	2160	5313	10910	20960	2313	7854	10496	22206	4473	13167	21406	3363	6625	43166	646	1948	7436	10608	690	2861	7164	11065	1336	4810	14599
42	sub42	1	26	5	69	175.1	69	52.7	30.8	24.6	19.8	34.7	32.4	31.7	24.4	20.1	34	32	38.7	-	-	47.2	40.3	94.1	3605	10195	13807	29714	3775	4027	13409	24002	7380	14222	27216	3643	7976	53716	468	2717	3473	6933	485	1072	3366	5287	953	3789	6839
43	sub43	1	57	2	78.4	166.8	78.4	51.5	32.2	12.8	-	29.7	28.3	32.5	22.6	17.8	33.6	32.4	43.5	39.7	88.3	43.5	38.3	90.2	2767	8705	12561	25754	1970	8504	12049	25508	4737	17209	24610	3563	7693	51262	964	3216	7992	12545	702	3147	7642	12128	1667	6363	15634
44	sub44	1	48	8	84.5	166.2	84.5	60.2	32.6	23.6	19.8	36.4	34.3	32.5	24	19.6	37.1	35.1	42.4	39.8	88.7	42.8	20.8	-	3266	5577	12342	22908	3266	6641	12801	25177	6532	12218	25143	3906	6767	48085	1323	3955	10389	16190	1323	4699	10774	17535	2646	8654	21164
45	sub45	1	59	2	64.6	163.5	64.6	49.8	33.3	4.9	-	28.3	25.5	32.4	22.6	20	29.4	27.3	43.8	35.7	91.7	43.2	36.6	91.4	2828	8807	10936	24739	2042	9162	10407	23917	4870	17970	21343	2861	6440	48656	556	1796	4114	6772	411	1868	3907	6513	966	3663	8021
46	sub46	1	40	2	88.9	174.1	88.9	58.3	29.4	11.3	-	26.6	24.8	28.7	11.6	-	26.8	25.5	47.3	39.8	94.7	46.8	39.8	94.3	1670	10865	13597	28212	1481	11218	13142	27986	3151	22082	26739	3850	9384	56199	811	4302	9531	15031	718	4433	9216	14762	1529	8735	18744
47	sub47	1	43	6	91.8	173.7	91.8	53.3	31.5	24.8	19.8	35.9	33.9	31.3	24.6	20.1	37.3	35.7	48.3	29.7	-	49.9	38.6	97.8	3830	11710	13198	31279	3641	8187	13570	27633	7471	19896	26768	3816	9308	58912	1181	3855	9780	15346	1123	2715	10074	14381	2304	6571	19855
48	sub48	1	37	6	92	180	92	56.8	31.5	22.8	20.7	34	31.5	30.7	22.8	20.7	34.8	32.5	49.7	15.8	-	48.8	40.4	96.5	3405	7259	14195	26806	3405	7259	15070	28022	6809	14518	29265	4222	9111	54828	1206	2631	9502	13759	1206	2631	10092	14420	2413	5261	19594
49	sub49	1	63	5	78.3	166.6	78.3	52.7	31.3	22.7	19.7	34.8	32.5	30.4	22.3	20.3	34.5	32.9	34.6	-	-	45.5	37.4	92.4	3137	10242	13006	28254	3287	3576	11272	20407	6424	13818	24278	3669	8030	48661	957	4157	9919	15463	1002	1483	8580	11586	1958	5640	18499
50	sub50	1	44	5	66.2	167.9	66.2	62.3	31.3	23.8	17.7	35.2	33.4	31.5	23.4	18.5	37.2	33.8	29.4	-	-	44.8	38.3	94.2	3483	10157	13049	28740	3539	3108	12458	21016	7023	13265	25507	3425	7995	49756	522	1980	5127	7915	530	627	4903	6325	1052	2607	10031
51	sub51	1	61	4	66.6	167	66.6	48.4	30.6	24.7	19.6	29.3	27.1	29.6	11	-	23.7	23.2	45.2	37.4	90.2	45.2	35.8	91.3	1433	8831	11596	23765	2623	9486	10908	25797	4056	18318	22504	3239	7187	49562	371	1641	5057	7368	676	1763	4748	7615	1048	3405	9805
52	sub52	1	55	8	74.7	167	74.7	50.3	29.3	25.2	17.8	35.5	32	29.6	24.8	17.8	32.3	31	45.7	37.6	93.8	46.5	20.3	-	3538	7694	13394	26502	3870	10873	12663	29768	7408	26057	3742	8699	56270	491	491	1857	5430	8051	529	2613	5129	8613	1020	4470	10559
53	sub53	1	48	3	77.8	179.9	77.8	55.5	31.8	23.9	18.6	34.5	30	21.9	-	-	23.8	22.9	49.8	38.8	97.2	49.9	38.7	95.8	949	9586	13315	25992	3257	10012	12557	28352	4206	19599	25872	3558	8387	54344	284	2561	6612	9822	950	2676	6228	10279	1234	5237	12840
54	sub54	1	46	2	71.9	165	71.9	51.3	28.8	8.8	-	29.8	28.8	29.5	24.8	18.8	33.8	32	45.6	38.6	88.6	43.8	13.8	-	2968	5588	12832	23738	1864	9456	11790	24912	4832	15043	24621	3499	7394	48650	814	1833	7065	10167	518	3087	6484	10437	1332	4920	13549
55	sub55	1	59	4	76.9	160.6	76.9	46.7	30.3	24.4	17.3	34.3	31	30.8	11.4	-	28.8	26.8	45.5	35.4	90.6	44.2	35.4	90.2	1673	8601	12857	24144	3091	9049	12292	27492	4764	17650	25149	3729	8273	51636	539	2370	8068	11178	953	2493	7696	11721	1492	4863	15764
56	sub56	1	58	8	54.3	163.4	54.3	49.5	31	25.5	19.2	27.8	22.5	30	25.5	19	25.9	22.5	45	37	87.8	43	20	-	2406	4946	11865	20778	2511	7586	11966	25081	4917	12531	23831	3303	6440	45859	248	864	1752	3031	259	1327	1766	3672	508	2191	3518
57	sub57	1	37	5	67.7	172.1	67.7	54.2	32	23.3	19.4	32.3	31.9	32.1	23.2	18.9	31.5	30.8	37.6	-	-	49.8	37	98.1	3265	10977	12869	29426	3446	3459	12785	22083	6711	14436	25654	3540	7829	51509	588	2920	4644	8486	622	928	4618	6514	1209	3849	9261
58	sub58	1	44	8	70.2	175.7	70.2	55.6	34.8	26.3	19.8	34.6	32.4	34.5	25.3	19.9	33.1	31.9	48.1	41.4	95.3	47.5	5.4	-	3219	3801	13509	22495	3617	10442	12419	28689	6836	14243	25927	3532	7824	51184	578	857	6021	7771	647	2302	5511	8812	1226	3159	11533
59	sub59	1	40	7	64.6	166.4	64.6	-	32.1	23.8	19.1	31.8	29.2	32.3	23.4	19.2	33.3	31	40.2	37.8	86.3	30.7	-	-	2995	3623	11997	20500	2983	9240	11480	26064	5978	12863	23477	3229	6892	46564	679	1077	5218	7300	674	2715	4983	8777	1354	3792	10200
60	sub60	1	41	8	68.9	171.5	68.9	54.1	30.9	23.1	20.2	35.4	32.2	30.6	22.4	19.7	32.4	28.3	46.1	37.3	92	47	13.1	-	2594	4155	10981	19599	3081	8354	10669	24340	5675	12509	21650	3313	6842	43939	713	1446	7051	9589	845	2892	6823	11006	1558	4337	13874
61	sub61	1	35	6	71.9	170.9	71.9	55	34.6	24.1	19.3	34	29.9	35	24.7	18.4	33.6	31.1	46.3	2.8	-	47	40.7	96.3	2781	10073	11948	27429	3227	4790	10760	20547	6008	14864	22708	3189	6964	47977	728	3237	7228	11682	848	1559	6505	9243	1576	4797	13732
62	sub62	1	36	3	79.7	171.2	79.7	56.8	33	24	20.4	37.5	34.4	20.5	-	-	26.6	26.5	46.4	39.4	93.9	46.7	39.5	95.3	939	9404	12157	24548	3122	10022	11709	26980	4061	19426	23866	3576	8440	51528	352	3535	8070	12396	1140	3767	7743	13109	1492	7302	15814
63	sub63	1	46	6	73	176.4	73	60.3	34.4	23.7	19.1	38.5	36.9	34.8	24.1	19.4	37.9	35.1	49.3	17.7	-	50.8	37.3	98.8	3671	8666	13375	27667	3862	6518	12775	25689	7533	15184	26150	3346	7646	53356	551	2540	5256	8643	579	1913	5018	7890	1131	4453	10274
64	sub64	1	31	8	70.5	164.1	70.5	48.4	31.2	23.3	19.3	32.7	31.7	32.1	23.9	19.3	32.7	31.5	45.7	35.4	91.2	45	15.9	-	2959	5693	11109	22195	2904	8190	10657	23585	5862	13883	21766	3148	6887	45780	744	2755	6405	10400	734	3963	6132	11204	1478	6719	12537
65	sub65	1	52	5	53.7	162.9	53.7	49.7	28.6	23.3	18.4	30.5	27.5	28.4	23.2	19.9	28.9	26.7	28.6	-	-	42.4	36.4	87.7	2651	9394	11679	25785	2799	2726	11640	19250	5450	12120	23319	3186	6593	45035	281	1467	1964	3925	296	427	1959	2896	577	1894	3923
66	sub66	1	39	8	101.1	181.1	101.1	52.5	32.3	25.3	20.8	41.9	39.5	32.5	25.3	20.1	41.7	39	51.5	43.6	102.3	50.6	13.9	-	4127	6715	14472	27309	4296	12233	13754	32500	8424	18947	28225	4396	9297	59809	1512	3584	12168	17733	1555	6502	11562	20136	3067	10086	23730
67	sub67	1	37	5	75.9	182.4	75.9	56.4	36.3	26	21.3	36.4	36	36	26.2	21.7	35.9	34.5	30.6	-	-	53.8	40.7	103.2	4808	11301	15929	34421	4826	3110	14993	25721	9634	14411	30922	4212	8833	60141	655	1899	4500	7339	658	538	4238	5766	1313	2438	8738
68	sub68	1	27	7	54.5	170.5	54.5	53.6	28.8	22.7	18.9	32.5	29.1	28.7	22.3	19.1	29.8	29	42.1	38.3	91.8	26.5	-	-	2676	2653	11432	18859	2829	8793	11319	24917	5504	11445	22751	2936	6925	43776	351	523	2486	3600	372	1728	2462	4788	722	2251	4948
69	sub69	1	39	3	77.7	177.6	77.7	54.2	33.4	25.8	19.2	34	32.2	18.6	-	-	23.9	23.9	50.2	41.8	98.4	50.2	40.7	99.2	616	10899	13137	26696	3802	10896	12574	29377	4418	21795	25711	3432	8480	56073	139	3187	5576	9223	814	3186	5325	9655	953	6373	10901
70	sub70	1	44	8	76.8	171.4	76.8	53.2	32.3	22.8	19.7	33.5	32.3	31.5	23.5	19.8	35.5	33.8	44.7	38.2	92.7	43.5	15.8	-	3090	5520	12263	23087	3058	9273	12516	27295	6148	14793	24779	3595	7375	50382	721	2074	7860	11109	715	3465	8015	12695	1435	5539	15875
71	sub71	1	38	8	60.6	161.9	60.6	48.6	29.5	21.8	17.3	34.2	30.2	29.5	22.3	18.3	29.8	28.1	43.7	36.3	89.6	43.3	8.3	-	2449	4911	12007	21536	3126	8909	12301	26524	5575	13820	24308	3168	7302	48060	344	1016	3097	4727	434	1835	3171	5713	778	2850	6268
72	sub72	1	42	6	76.5	177.5	76.5	50.8	33.7	26.4	20.8	34.5	32.3	33.5	26.2	20.2	34.9	32.9	51.5	14.3	-	51.5	40.5	100.3	3535	9822	12845	29192	3663	6213	12298	23972	7197	16035	25143	3428	7955	53163	876	2859	6635	10896	908	1826	6356	9407	1783	4685	12990
73	sub73	1	61	7	62.2	169.4	62.2	51.8	29.8	24.4	20.5	32.5	30.3	29.9	23.8	20.3	31	28.8	44.6	36.8	93.3	25.3	-	-	2707	2295	11771	18847	3068	8781	11427	25585	5775	11077	23198	3304	6371	44432	512	610	5762	7224	563	2237	5589	8768	1075	2847	11351
74	sub74	1	37	5	86.6	183.6	86.6	55.3	33.4	26.5	20.8	40	37.5	33.6	26.6	21.4	41.2	38.5	35.8	-	-	50.8	36.4	98.2	3995	7688	14336	27998	4217	3692	13547	23957	8213	11380	27882	3788	7928	51955	1282	5157	9971	16882	1368	2478	9384	13821	2650	7636	19355
75	sub75	1	37	7	63.8	178	63.8	53.3	30.7	24.5	19.3	35.5	34.2	30.3	24.5	19.3	32.8	32.3	49.8	37.8	96.5	32	-	-	3341	2491	13140	20912	3721	9925	13266	30056	7062	12415	26406	3535	7075	50968	409	410	3307	4349	456	1599	3332	5744	865	2009	6639
[truncated: 633 more columns]

## Sheet: code book
			Variables	Measure	Contents
			No
			Name	Sub1~75
			Sex	gender	1=male	2=female
			age	year
			amputated region	amputated region about limb	1=Right above-elbow amputation	2=Right below-elbow amputation	3=Left above-elbo amputation	4=Left below-elbow amputation	5=Right above-knee amputation	6=Right below-knee amputation	7=Left above-knee amputation	8=Left below-knee amputation
			HT	whole-body height (cm)
			Weight	whole-body Weight (kg)
			Trunk_Lth	trunk_length (cm)	anterior region of trunk
			1_2	Length of Right Upper arm (cm)
			2_3	Length of Right Lower arm (cm)
			3_4	Length of Right hand (cm)
			1_2_Con	Circumperence of right upper arm in contraction (cm)
			1_2_Rel	Circumperence of right upper arm in relaxing (cm)
			5_6	Length of left Upper arm (cm)
			6_7	Length of left Lower arm (cm)
			7_8	Length of left hand (cm)
			5_6_Con	Circumperence of left upper arm in contraction (cm)
			5_6_Rel	Circumperence of left upper arm in relaxing (cm)
			A_B	Length of Right upper leg from Anterior Superior Iliac Spine(ASIA) to Patella center (cm)
			B_C	Length of Right lower leg from Patella center to Malleolus (cm)
			A_Heel	Length of Right leg from ASIS to Hell pad (cm)
			D_E	Length of left upper leg from Anterior Superior Iliac Spine(ASIA) to Patella center (cm)
			E_F	Length of left lower leg from Patella center to Malleolus (cm)
			D_Heel	Length of left leg from ASIS to Hell pad (cm)
			Z~BO	DXA PARAMETERS
			BQ~ZH	BIA PARAMETERS
				Abbreviations
				BIA	Bioelectrical impedance analysis
				BMC	Bone mineral content
				BMI	Body Mass Index
				DXA	Dual Energy X- ray Absorptiometry
				FFM	Fat free mass
				FM	Fat free mass
				PBF	Percent Body Fat
				LA	Left arm
				LL	Left leg
				PhA	Phase angle
				RA	Right arm
				RL	Right leg
				SLTM	Soft lean tissue mass
				TBW	Total body water
				TE	Total error
				TR=Tr	Trunk
				Xc	Reactance
				Z	Impedance
				ZI	Impedance index
				1_RA_Z	1khz_Right Arm_Impedance
				50_RA_Z	50khz_Right Arm_Impedance
				250_RA_Z	250khz_Right Arm_Impedance
				500_RA_Z	500khz_Right Arm_Impedance
				1M_RA_Z	1000khz_Right Arm_Impedance
